# Supplementary material for: A visible-light-responsive molecularly imprinted polyurethane for specific detection of dibenzothiophene in gasoline
Source: Royal Society of Chemistry journal article supplement (doi:10.1039/d1ay02128a), 2022-01-01
Supplement: d1ay02128a1.pdf [file d1ay02128a1.pdf]

*Supporting Information for Analytical Methods*

**A visible-light-responsive molecularly imprinted polyurethane for specific detection of dibenzothiophene in gasoline**

Yamin Si, Feng Jiang, Liang Qiang, Xiaotong Teng, Chengbin Gong\* and Qian Tang\*

The Key Laboratory of Applied Chemistry of Chongqing Municipality, College of Chemistry and Chemical Engineering, Southwest University, Chongqing, 400715, P. R. China.

|                                                                                |   |
|--------------------------------------------------------------------------------|---|
| S1. Synthesis of HPB.....                                                      | 2 |
| S2. FT-IR spectra.....                                                         | 3 |
| S3. Gas chromatography analysis.....                                           | 3 |
| S4. Reversibility of photoisomerization for HPB.....                           | 4 |
| S5. Selective adsorption of DBT, biphenyl and fluorene by VMIPU and VNIPU..... | 4 |
| References.....                                                                | 5 |

## S1. Synthesis of HPB

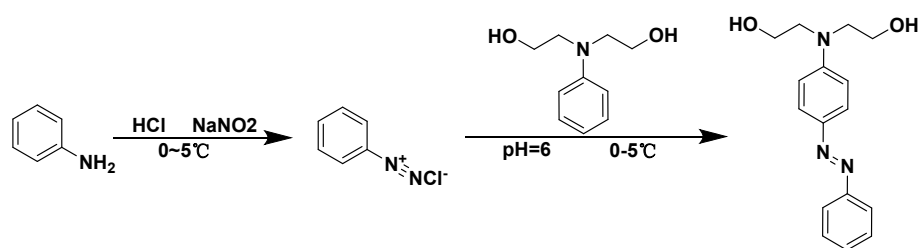

Scheme S1. Synthetic route for HPB.

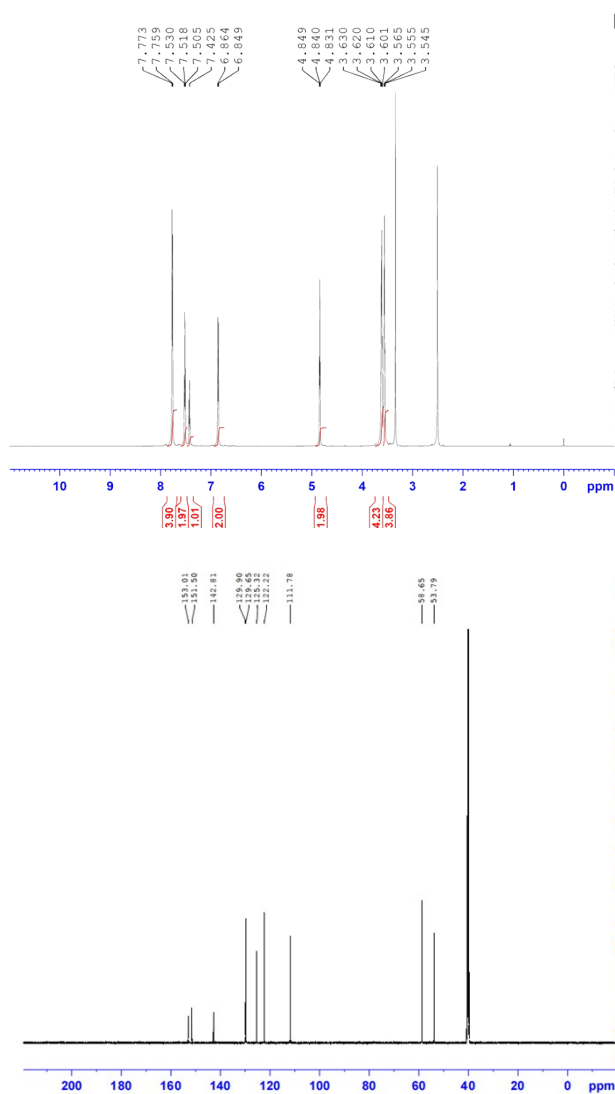

Fig. S1. <sup>1</sup>H NMR (top) and <sup>13</sup>C NMR (bottom) spectra of HPB.

## S2. FT-IR spectra

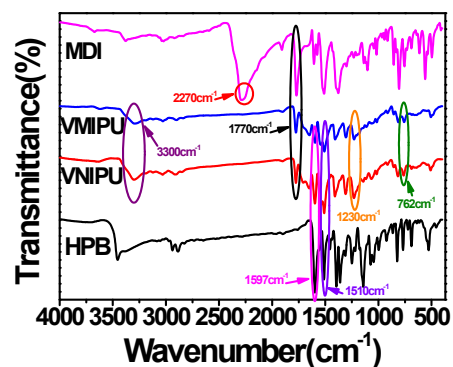

Fig. S2. FT-IR spectra of MDI, VMIPU, VNIPU and HPB.

## S3. Gas chromatography analysis

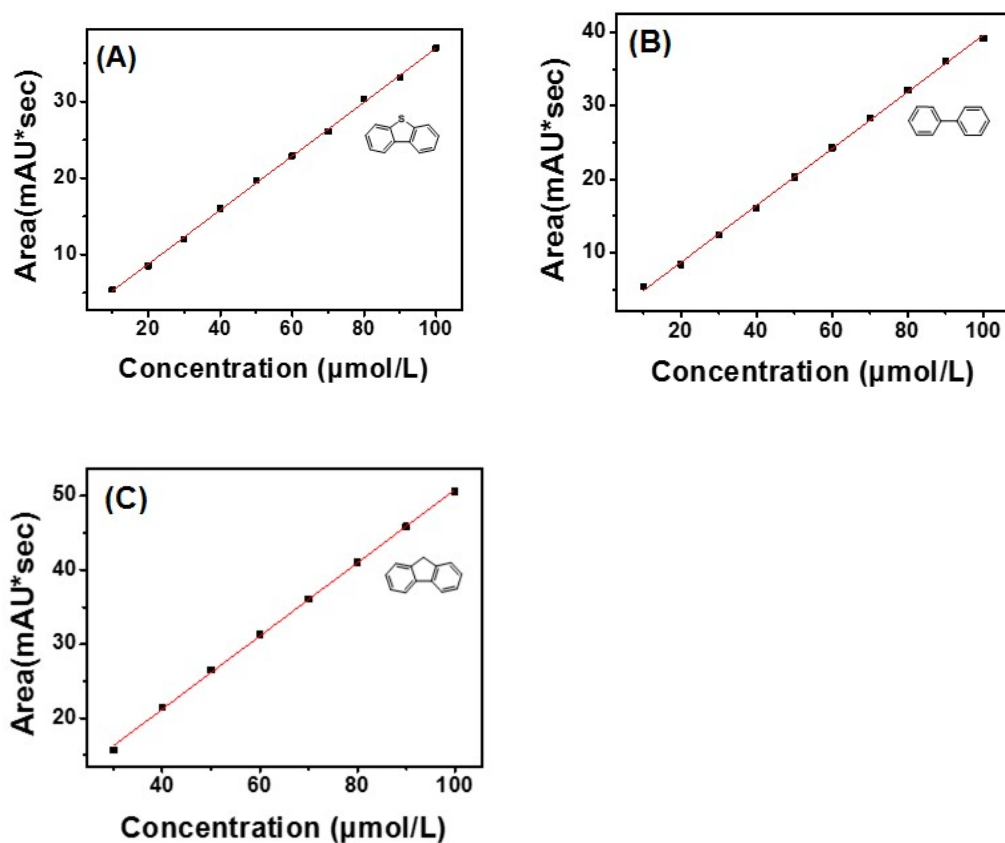

Fig. S3. Variation of the peak area of DBT (A), biphenyl (b) and fluorine (c) with concentration in DMSO. The peak area was measured by an Agilent 6890A gas chromatogram.

## S4. Reversibility of photoisomerization for HPB

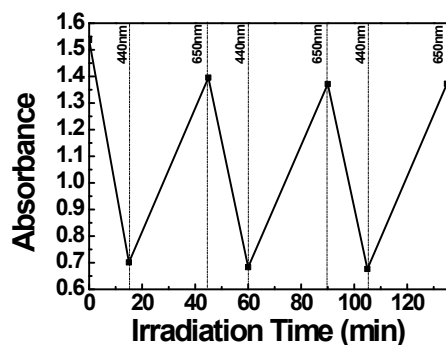

**Fig. S4.** Reversibility of the photoisomerization processes of azobenzene chromophores in the HPB in DMSO upon alternate irradiation at 440 and 650 nm.

### S5. Selective adsorption of DBT, biphenyl and fluorene by VMIPU and VNIPU

**Table S1** The selectivity parameters of VMIPU and VNIPU.

| Materials    | Adsorbents | $K_D$ (L g <sup>-1</sup> ) |                   | k      | k'     |
|--------------|------------|----------------------------|-------------------|--------|--------|
|              |            | $K_{D(DBT)}$               | $K_{D(Analogue)}$ |        |        |
| DBT/Biphenyl | VMIPU      | 0.1629                     | 0.0280            | 5.8179 | 5.5968 |
|              | VNIPU      | 0.0368                     | 0.0354            | 1.0395 |        |
| DBT/Fluorene | VMIPU      | 0.1519                     | 0.0164            | 9.2622 | 4.7729 |
|              | VNIPU      | 0.0392                     | 0.0202            | 1.9406 |        |

$K_D$ , distribution coefficient;  $K_D = \{(C_0 - C_e)/C_e\} \times (V/W)$ , where  $C_0$  is the initial concentration,  $C_e$  is the final concentration solution,  $V$  is the volume of the solution, and  $W$  is the mass of the adsorbent;  $k$ , selectivity coefficient,  $k = K_{D(template)}/K_{D(analogue)}$ ;  $k'$ , relative selectivity coefficient,  $k' = k_{imprinted}/k_{nonimprinted}$ .<sup>1</sup>

### References

[1] D.M. Han, G.Z. Fang, X.P. Yan. Preparation and evaluation of a molecularly imprinted sol - gel material for on-line solid-phase extraction coupled with high performance liquid chromatography for the determination of trace pentachlorophenol in water samples. *J. Chromatogr. A* 1100 (2005) 131 - 136.
